# Supplementary material
Source: MDPI journal article supplement (https://www.mdpi.com/2673-4591/6/1/5)
Supplement: s1 [file s1]

# Tungsten Oxide based Hydrogen Gas Sensor Prepared by Advanced Magnetron Sputtering

Nirmal Kumar\*, Stanislav Haviar, Jiří Čapek, Jiří Rezek, Šárka Batková, Petr Zeman, Pavel Baroch  
 Department of Physics and NTIS, Faculty of Applied Sciences, University of West Bohemia, Czech Republic  
 \* kumarn@kfy.zcu.cz

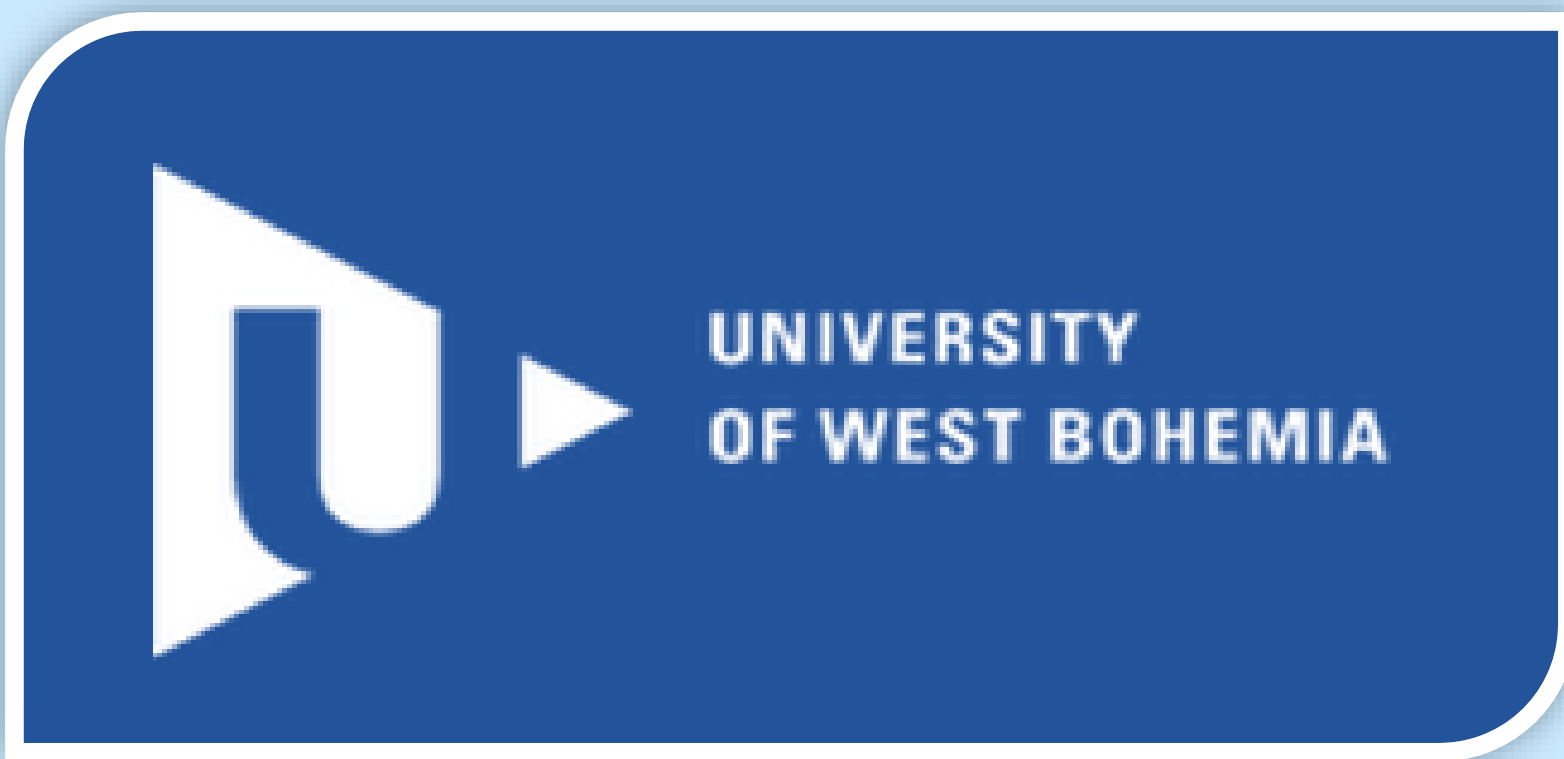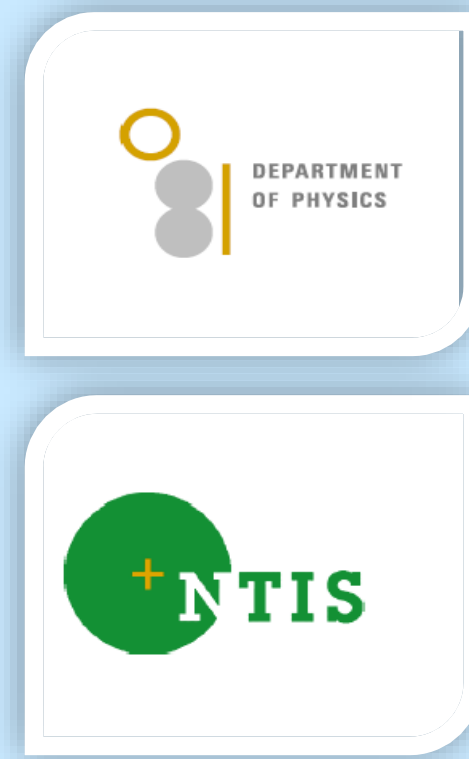

## Conductometric Sensors

### Sensing Mechanism

- preadsorbed  $O_2$  gather free electrons
- hydrogen is adsorbed at surface (may be assisted by catalyst)
- $H_2$  and  $O_2$  reaction returns electron back to the semiconductor  $\rightarrow$  increased conductivity

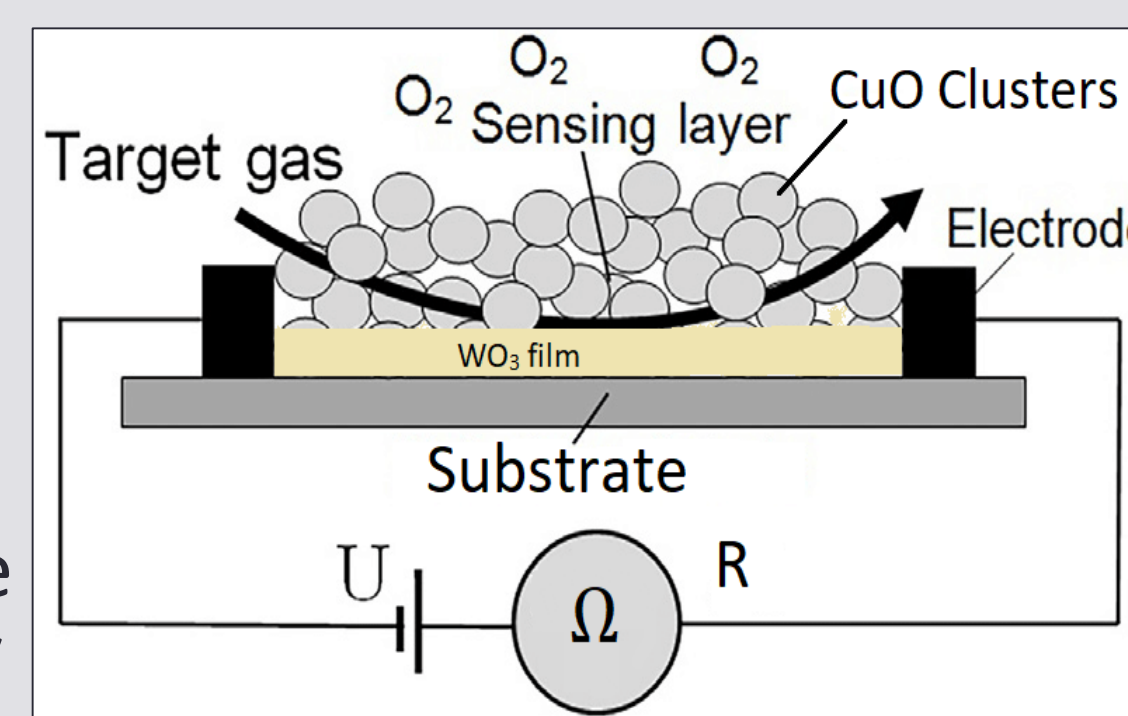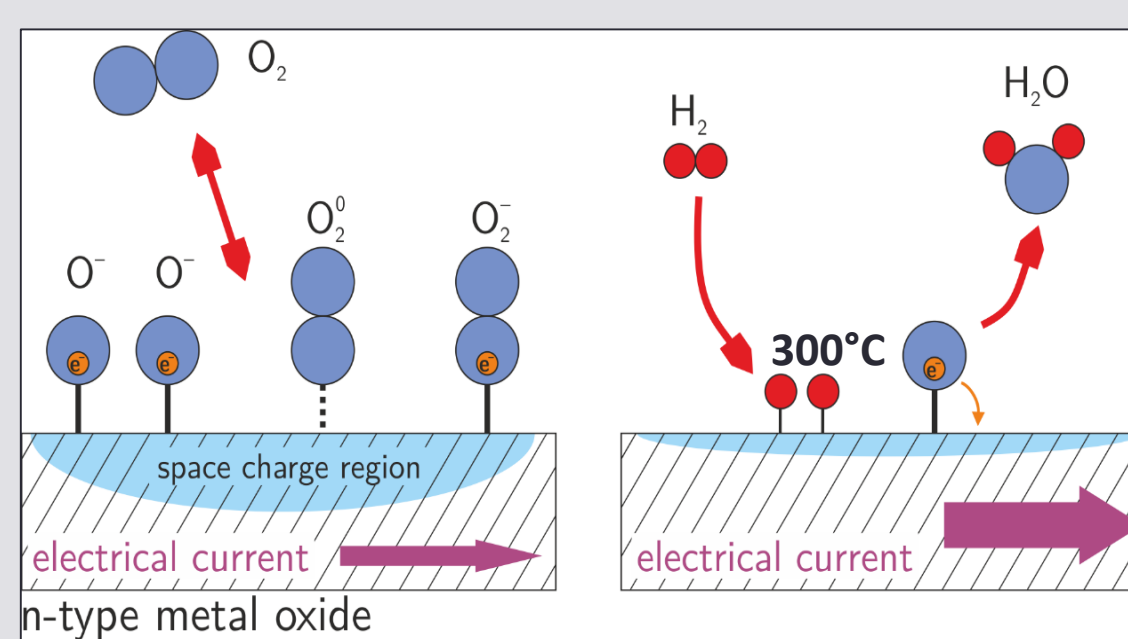

## Specimen Preparation

### WO<sub>3</sub> Thin Film

- Reactive Magnetron Sputtering from W target in DC and HiPIMS mode.

### CuO Thin Film and Pd Clusters

- Reactive magnetron sputtering from Cu and Pd targets in RF mode.

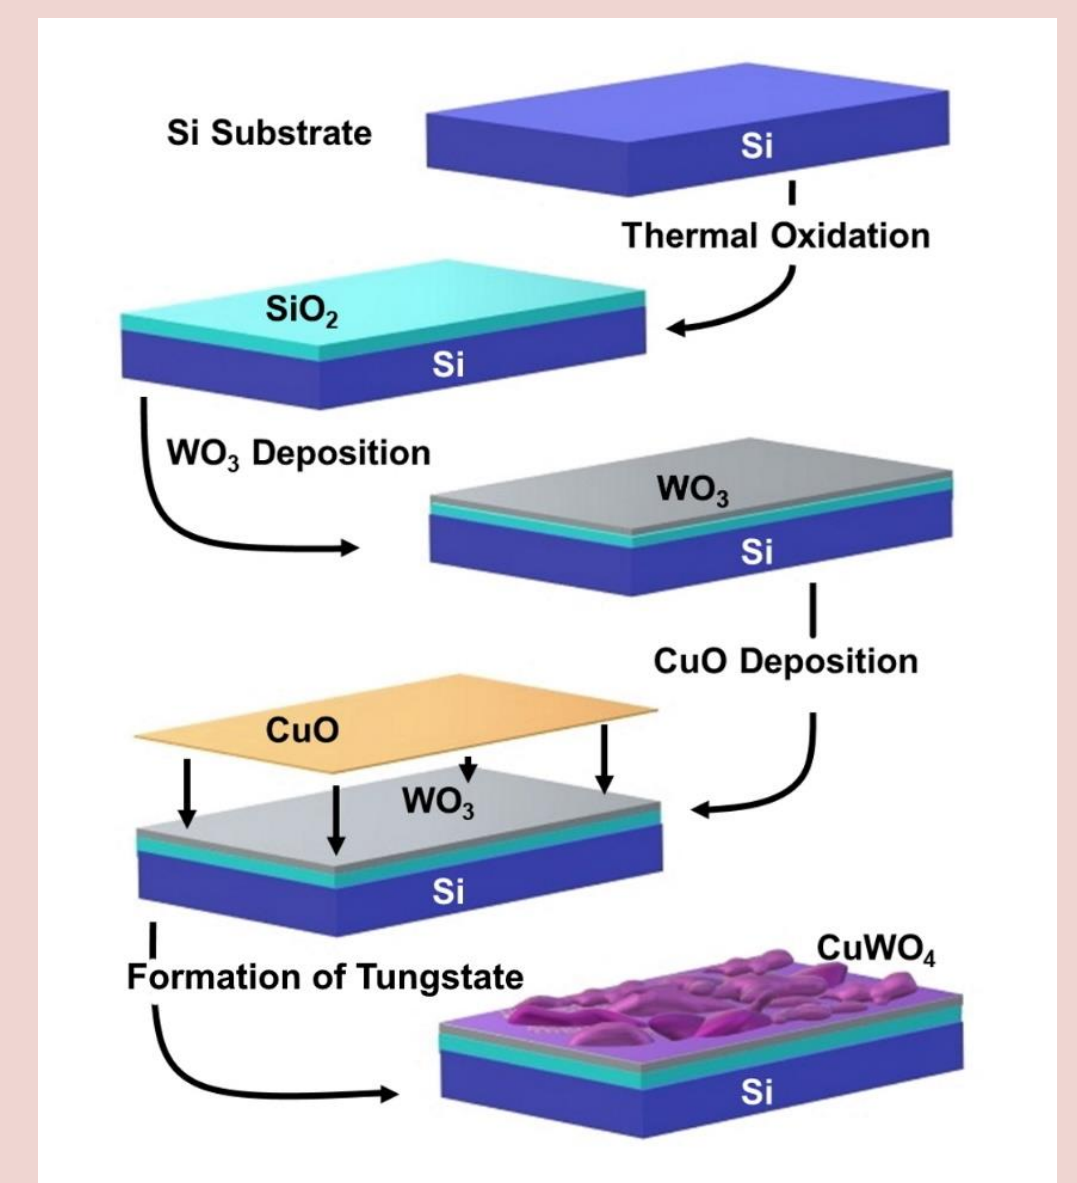

## Hydrogen Sensors

### Motivation

In recent years,  $H_2$  is getting much attention as a potential clean energy source of upcoming generation of fuel based systems and household appliances.

Metal oxide semiconductors are most widely studied gas sensing materials due to their fast and high sensitivity toward gases like  $H_2$ ,  $NO_x$ ,  $NH_3$  etc.

The enhancement of sensorial response can be done by addition of suitable materials and/or by changing geometrical properties of sensor assembly.

## WO<sub>3</sub> Thin Film Structure

XRD

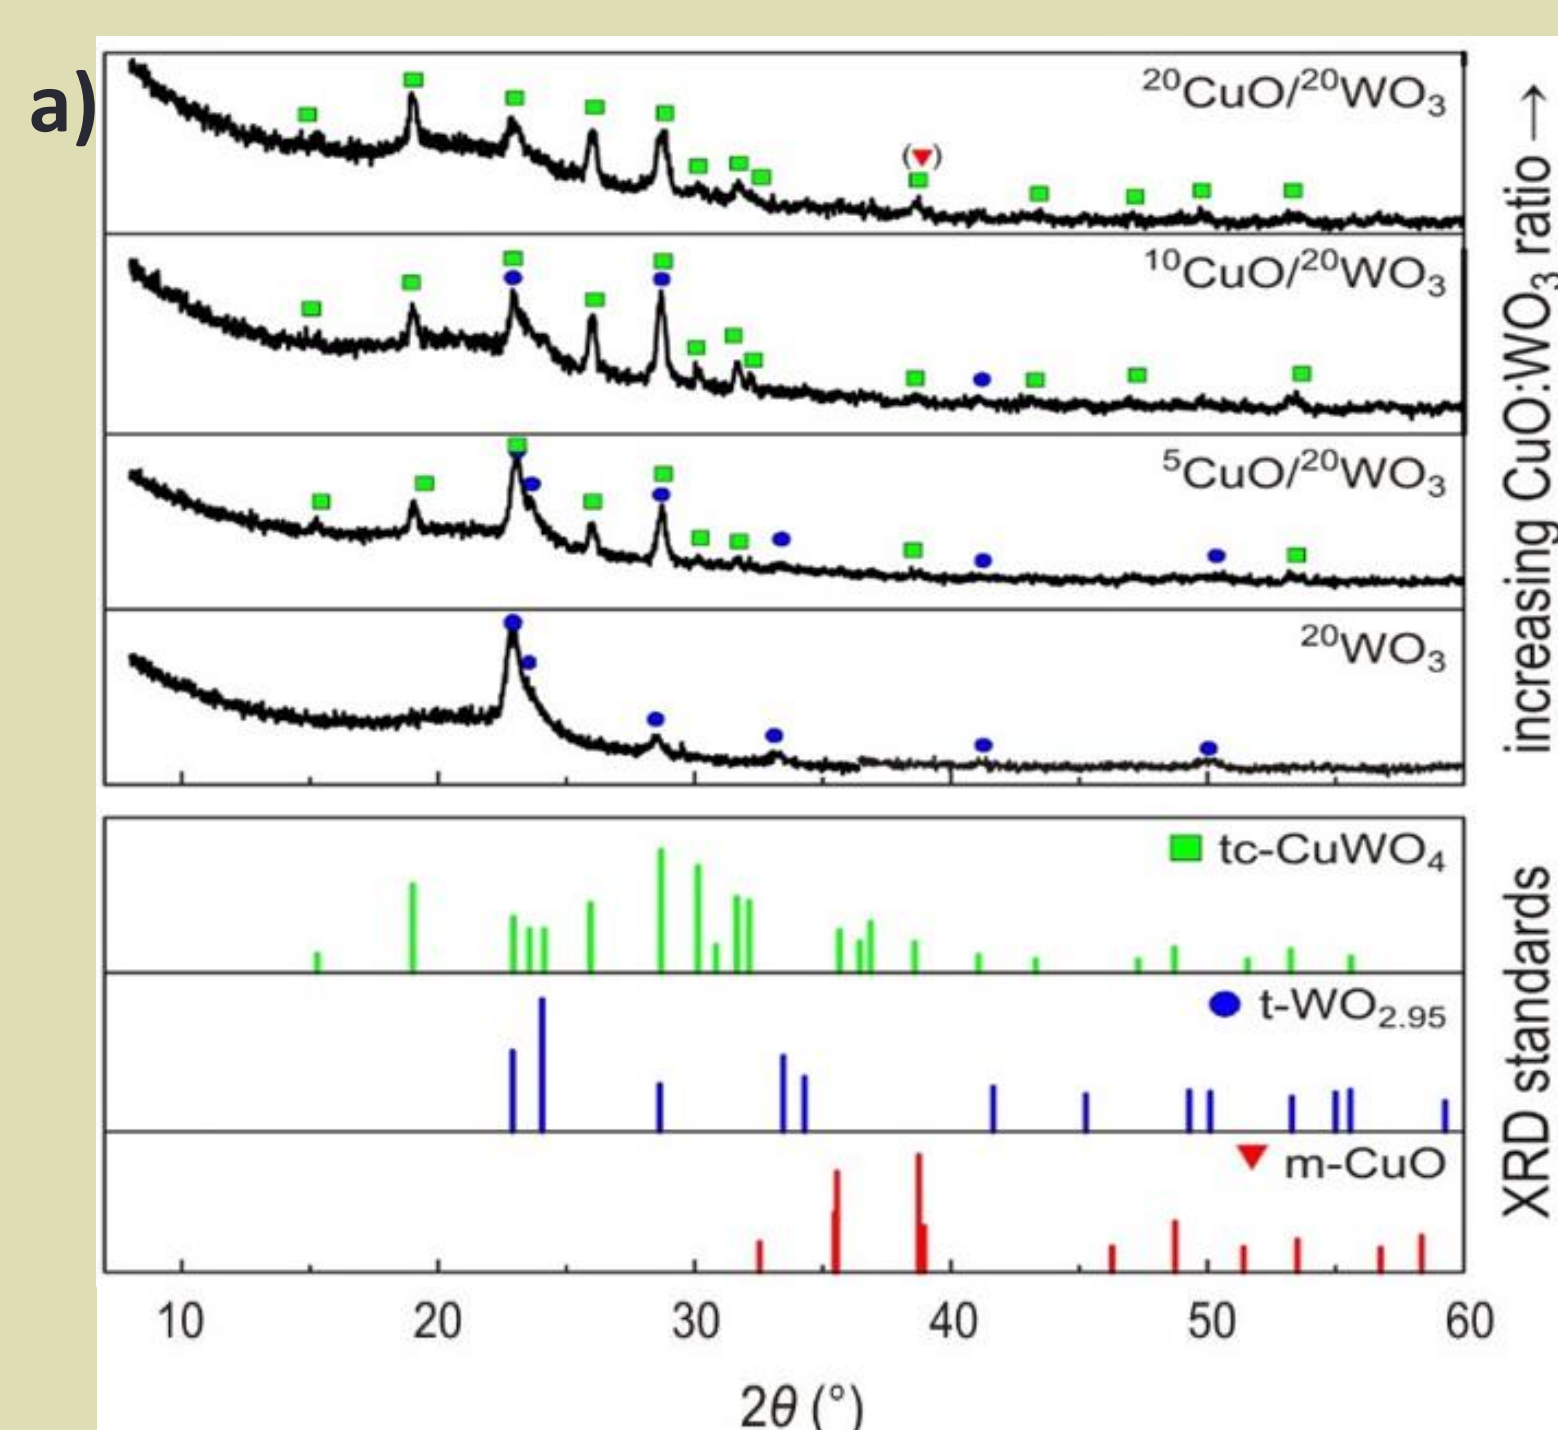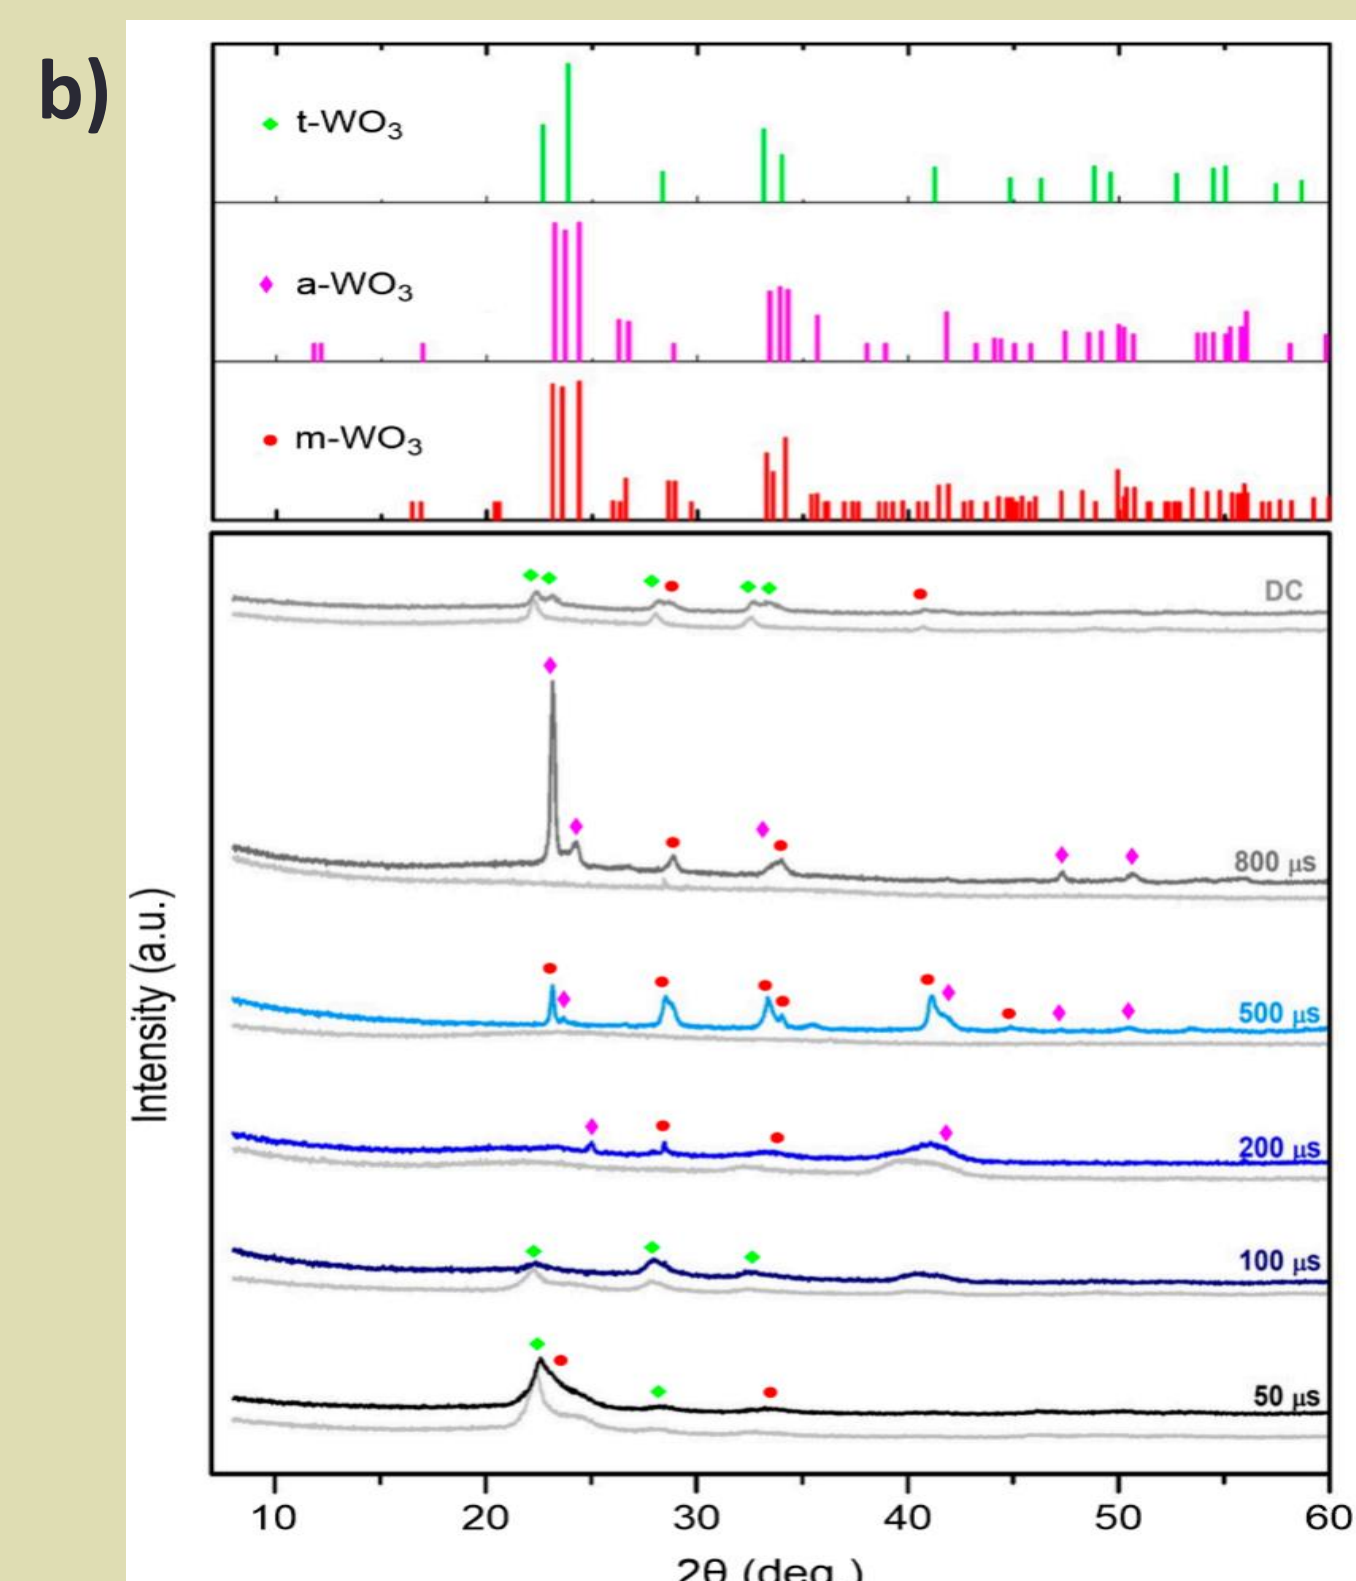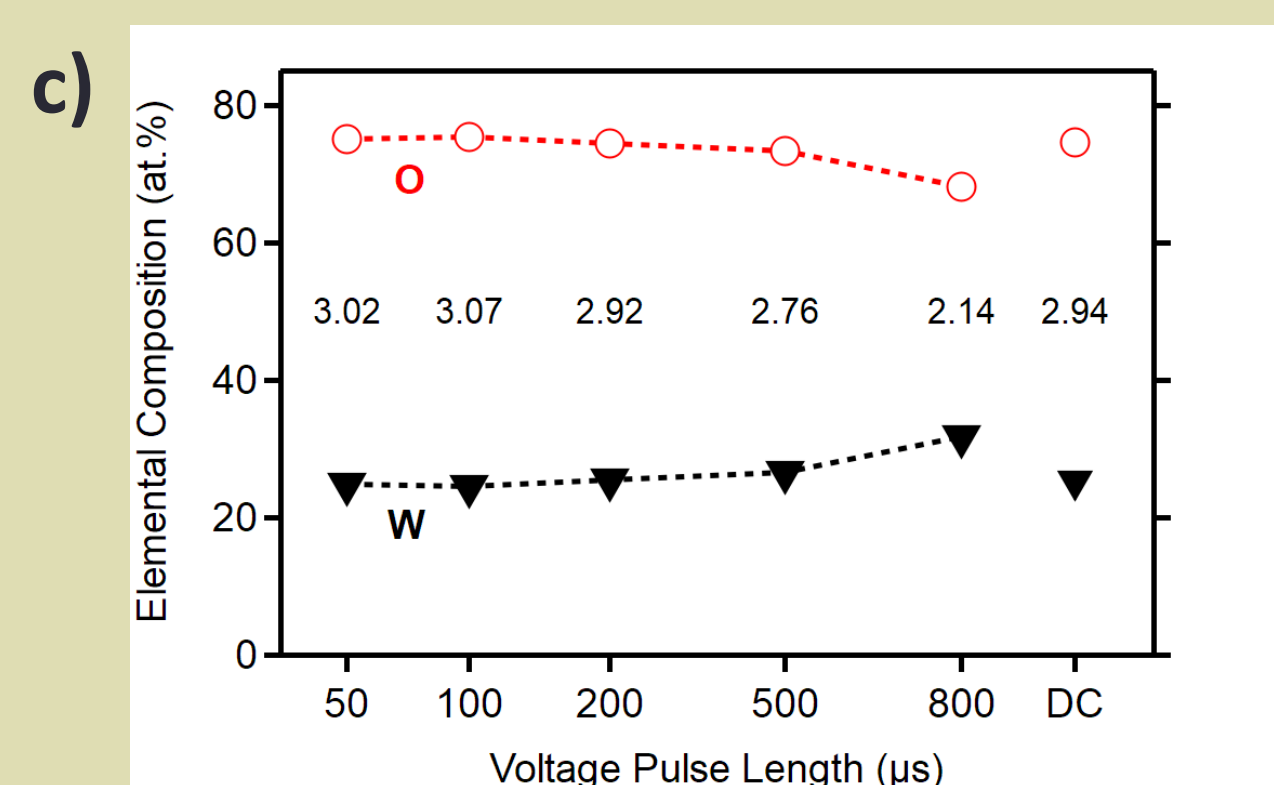

- As deposited  $WO_3$  thin films,  $CuWO_4$  loaded  $WO_3$  (a), Pd Loaded HiPIMS deposited  $WO_3$  measured film up to  $350^\circ C$ , (colored curves in (b)) and Change in Stoichiometry with Voltage Pulse length (c).

## Morphology

Cu Clusters/ $WO_3$

SEM

- 3 different architectures and combinations on  $WO_3$  films
- Density of Cu nanoclusters and  $CuWO_4$  nano-island on  $WO_3$  thin film varied.
- Formation of heterojunctions

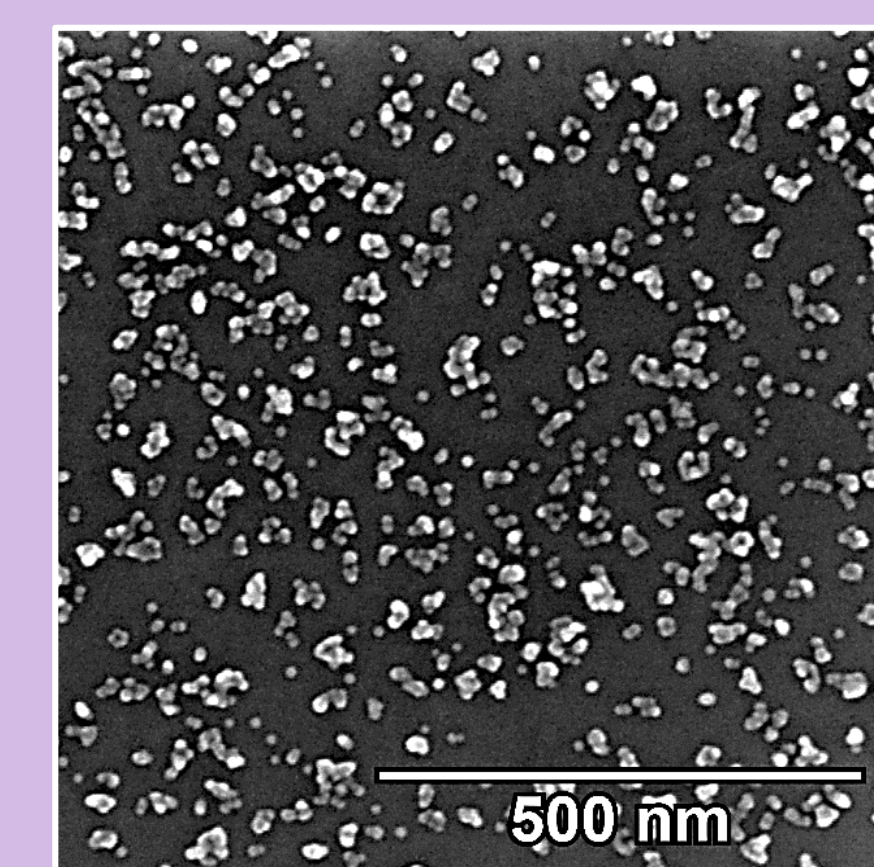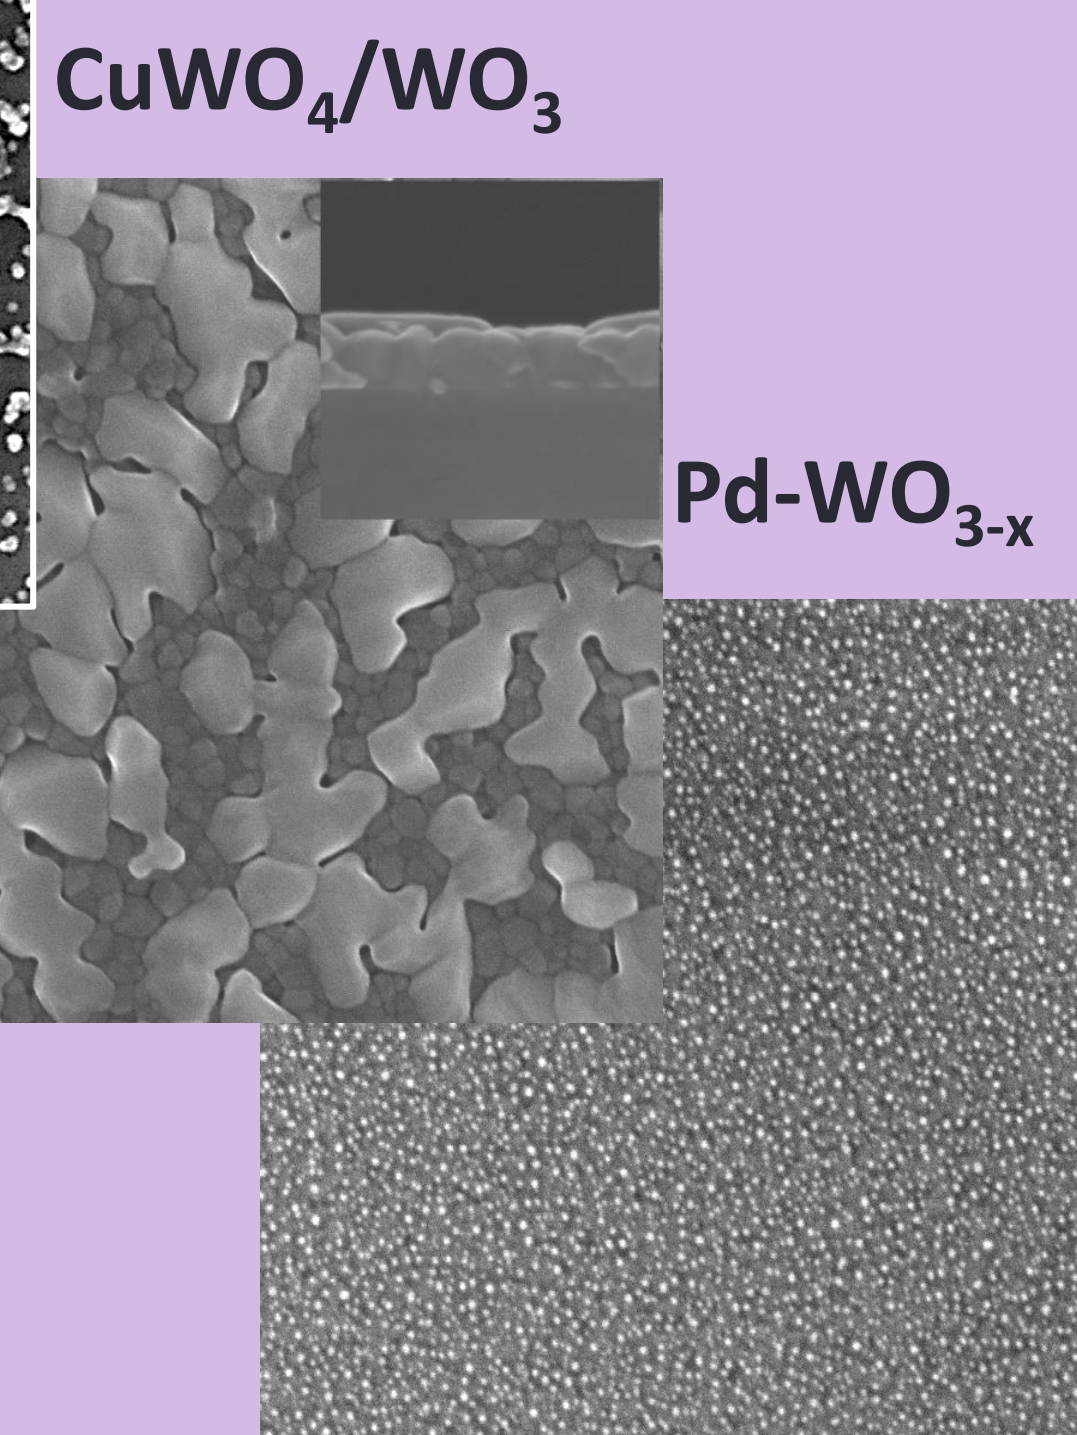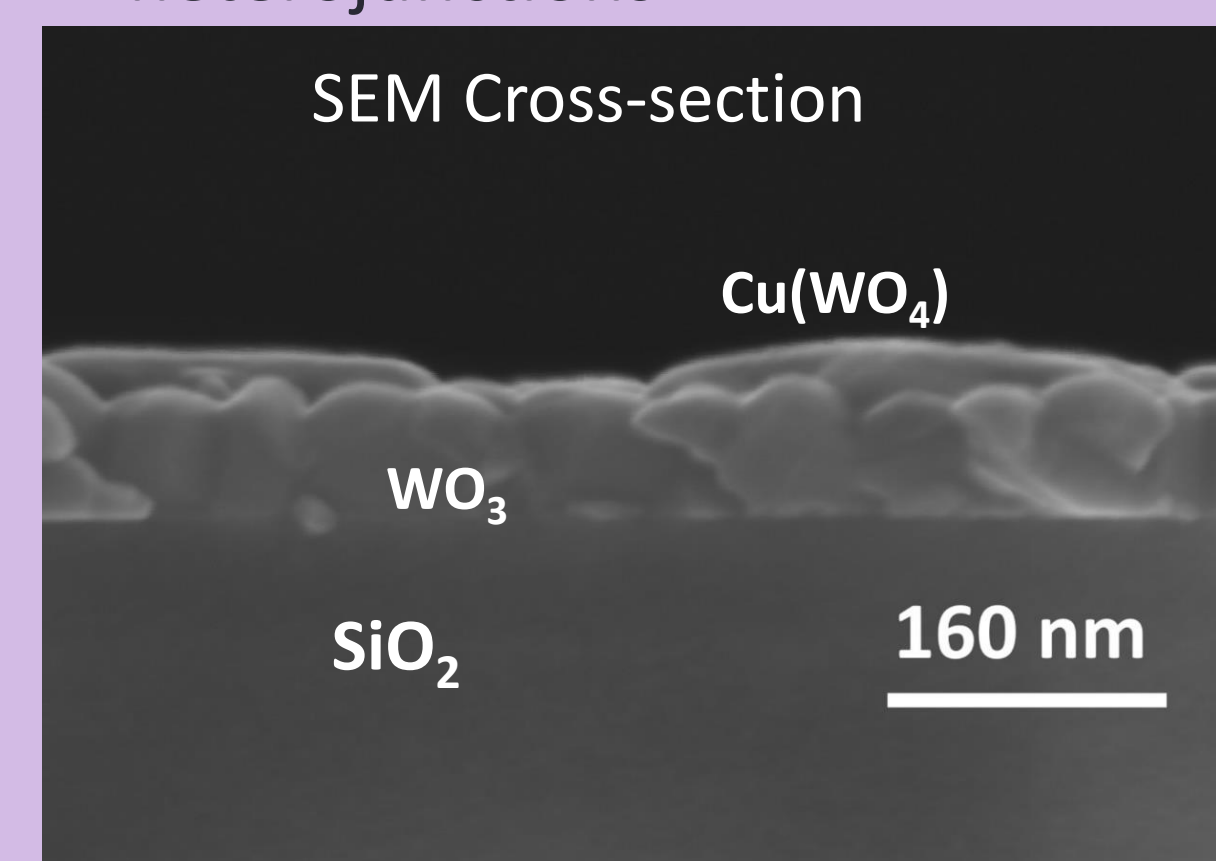

## Explanation: Formation of Homo/Heterojunction

- Cu Clusters and  $WO_3$  formed PN nano-junctions at the interface which alter the resistance and enhance the response
- $Cu(WO_4)$  and  $WO_3$  formed NN-type junction which give depletion and accumulation layers and change the response.
- Variation in Oxygen vacancies by HiPIMS and Crystalline structure enhanced the sensor response.

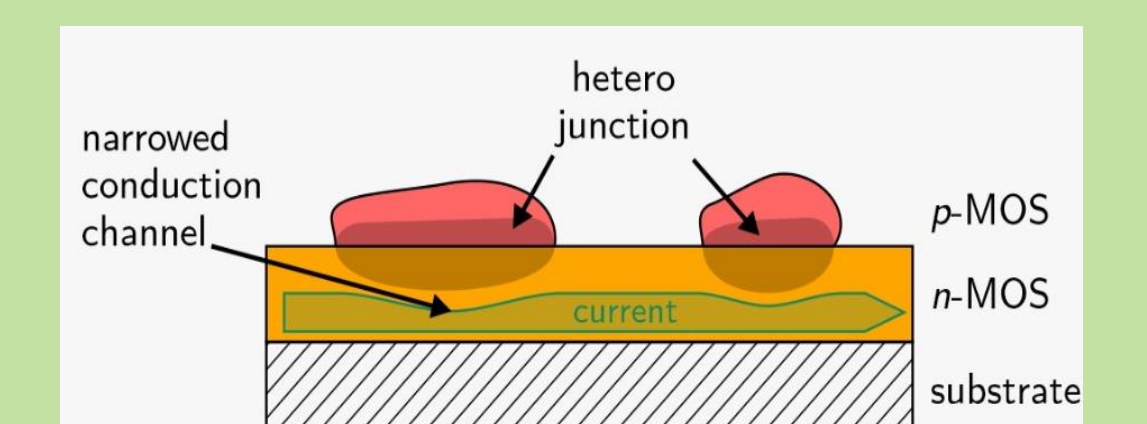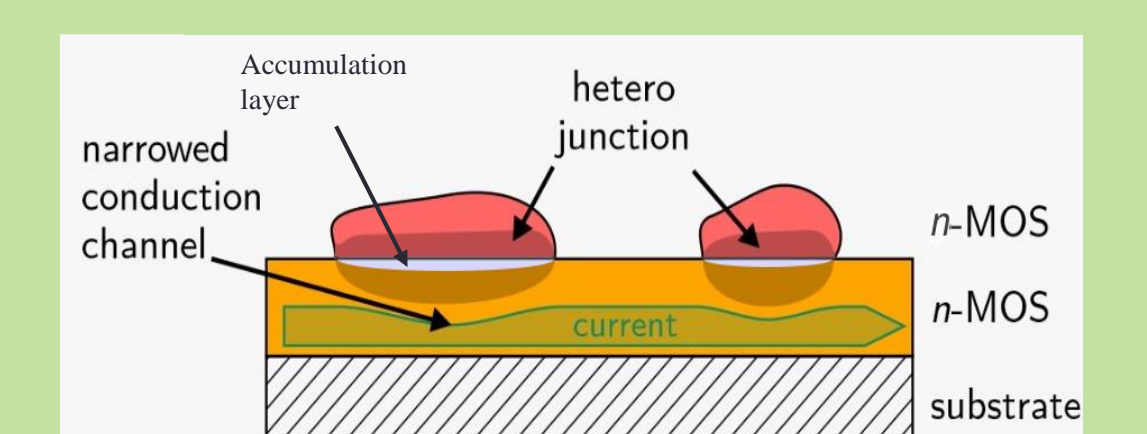

## Sensorial Response

Cu Clusters/ $WO_3$

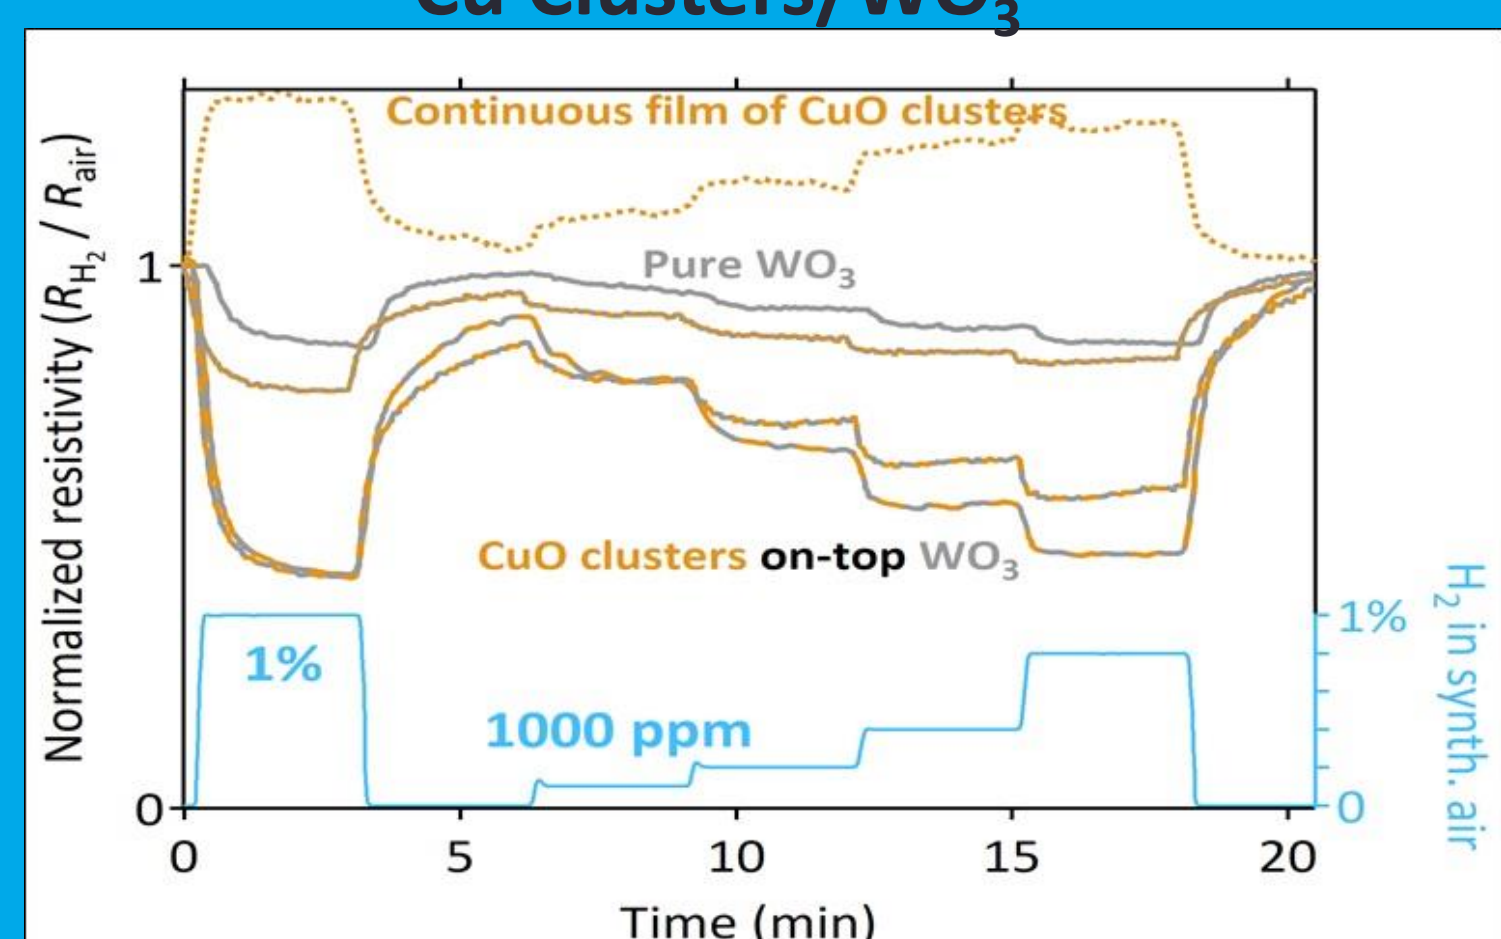

$CuWO_4/WO_3$

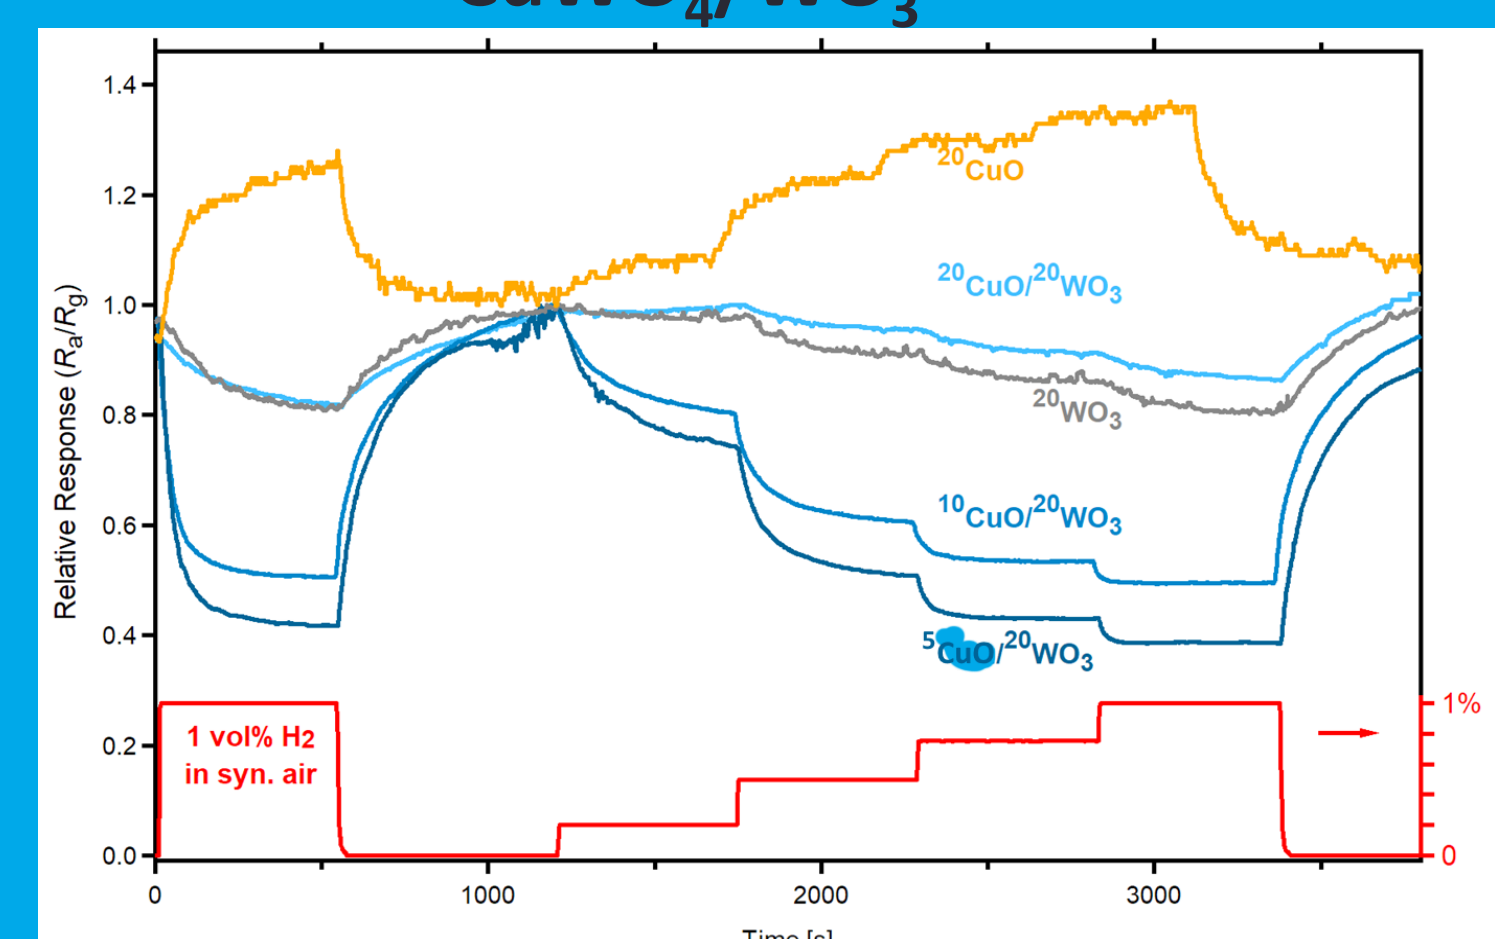

Pd- $WO_{3-x}$

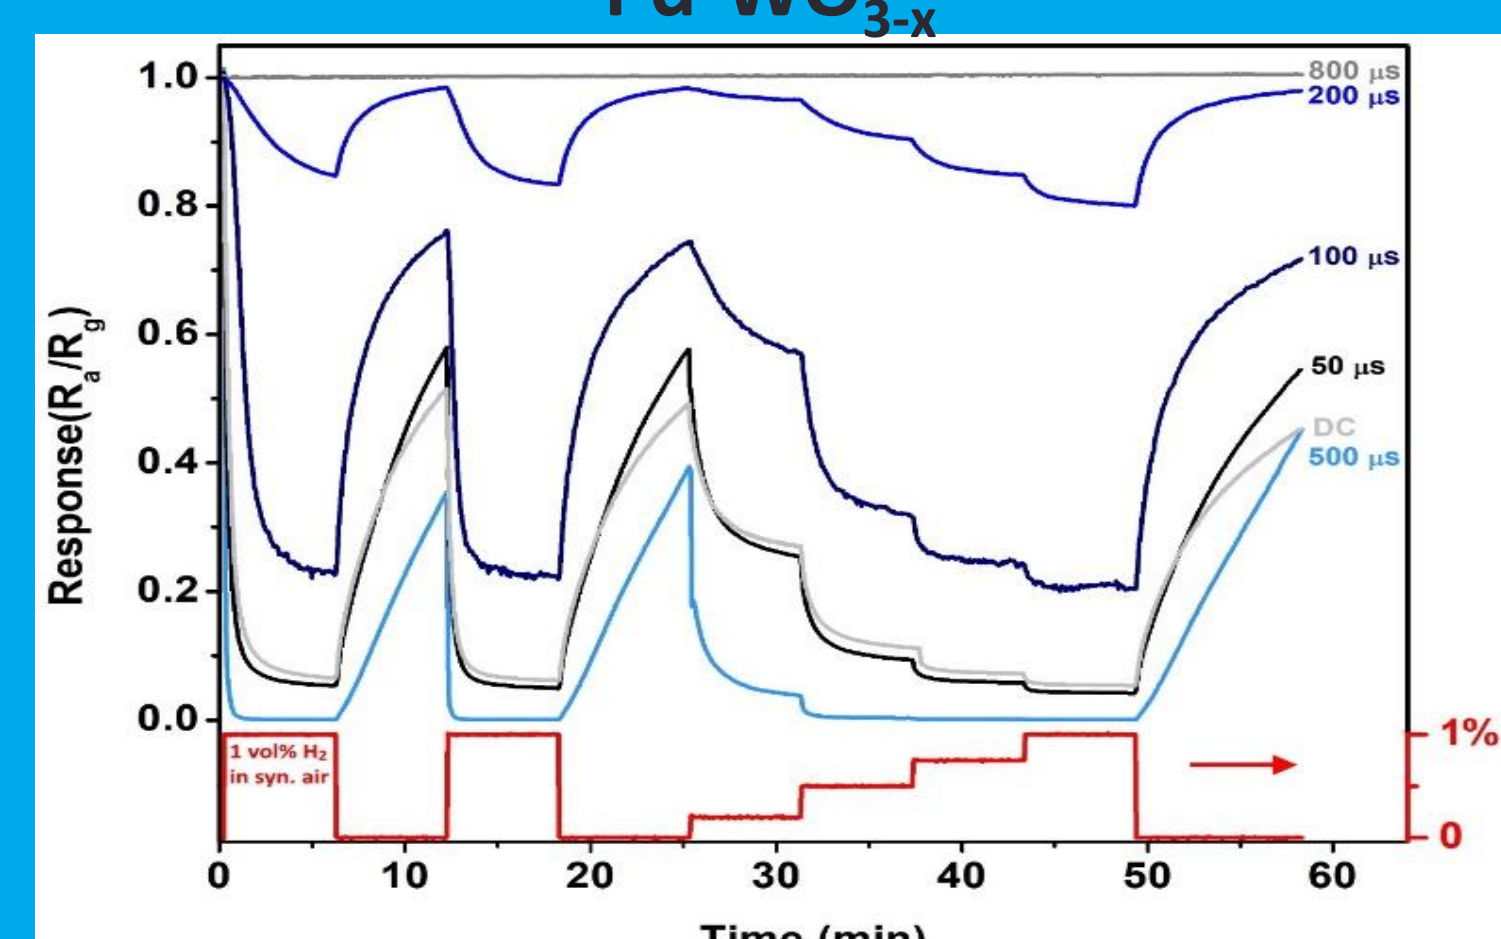

### Specimen Response Method

| Specimen           | Response | Method    |
|--------------------|----------|-----------|
| Cu Cluster/ $WO_3$ | 2        | DC        |
| $CuWO_4/WO_3$      | 5        | RF/DC     |
| Pd/ $WO_{2.76}$    | 60       | RF/HiPIMS |

## Conclusion

- Nanoclusters has been prepared by magnetron sputtering
- Ternary Oxide successfully prepared by a two-step deposition process by Magnetron Sputtering.
- Combinations of Various metal-oxide semiconductors can improve the sensory response.
- Nanostructures and Pd nanoparticles enhanced response significantly.
